# Supplementary material for: Coevolutive, evolutive and stochastic information in protein-protein interactions
Source: PubMed Central journal article supplement — Comput Struct Biotechnol J. 2019 Nov 20;17:1429–35. doi: 10.1016/j.csbj.2019.10.005 (PMC6906720; doi:10.1016/j.csbj.2019.10.005), 2019-11-20
Supplement: mmc1.pdf [file mmc1.pdf]

## Supporting Information

### Coevolute, Evolutive and Stochastic Information in Protein-Protein Interactions

Miguel Andrade, Camila Pontes and Werner Treptow

Laboratório de Biologia Teórica e Computacional (LBTC), Universidade de Brasília DF, Brasil

#### Derivation of Main Text Equations

Consider two proteins  $A$  and  $B$  that interact via formation of  $i=1, \dots, N$  independent amino-acid contacts at the molecular level. Proteins  $A$  and  $B$  are assumed to evolve throughout  $M$  distinct coevolution processes  $z$  described by the stochastic variable  $Z$  with probability mass function  $\rho(z)$ ,  $\forall z \in \{1, \dots, M\}$ . Given any specific process  $z$ , their interacting amino-acid sequences are respectively described by two  $N$ -length blocks of discrete stochastic variables  $(X_1, \dots, X_N)$  and  $(Y_1, \dots, Y_N)$  with probability mass functions  $\{\rho(x_1, \dots, x_N), \rho(y_1, \dots, y_N), \rho(x_1, \dots, x_N, y_1, \dots, y_N|z)\}$  such that

$$\begin{cases} \rho(x_1, \dots, x_N) = \sum_{y_1, \dots, y_N} \rho(x_1, \dots, x_N, y_1, \dots, y_N|z) \\ \rho(y_1, \dots, y_N) = \sum_{x_1, \dots, x_N} \rho(x_1, \dots, x_N, y_1, \dots, y_N|z) \end{cases} \quad (S1)$$

and

$$\sum_{x_1, \dots, x_N, y_1, \dots, y_N} \rho(x_1, \dots, x_N, y_1, \dots, y_N|z) = 1 \quad (S2)$$

over every joint sequence  $\{x_1, \dots, x_N, y_1, \dots, y_N\}_{\chi^{2N}}$  defined in the alphabet  $\chi$  of size  $|\chi|$ .

Under these considerations, we are interested in quantifying the amount of information that protein  $A$  stores about the interacting amino-acids of protein  $B$  conditional to any given coevolution process. As made explicit in eq. [1], we are particularly interested in the situation in which marginals of the  $N$ -block variables  $\{\rho(x_1, \dots, x_N), \rho(y_1, \dots, y_N)\}$  are independent of process  $z$  meaning that, for a fixed sequence composition of proteins  $A$  and  $B$  only their joint distribution depends on coevolution. Furthermore, by assuming  $N$ -independent contacts, we want that information to be quantified for the least-constrained model  $\rho^*(x_1, \dots, x_N, y_1, \dots, y_N|z)$  that maximizes the conditional joint entropy between  $A$  and  $B$  - that condition ensures the mutual information to be written exactly, in terms of the individual contributions of contacts  $i$ .

Given its entropy-maximization property<sup>1</sup>,  $\rho^*(x_1, \dots, x_N, y_1, \dots, y_N|z)$  factorizes into the conditional joint distributions of individual contacts  $i$

$$\rho^*(x_1, \dots, x_N, y_1, \dots, y_N|z) = \prod_{i=1}^N \rho^*(x_i, y_i|z) \quad (S3)$$

such that

$$\begin{cases} \rho^*(x_1, \dots, x_N|z) = \sum_{y_1, \dots, y_N} \rho^*(x_1, \dots, x_N, y_1, \dots, y_N|z) = \prod_{i=1}^N \sum_{y_i} \rho(x_i, y_i|z) = \prod_{i=1}^N \rho(x_i|z) \\ \rho^*(y_1, \dots, y_N|z) = \sum_{x_1, \dots, x_N} \rho^*(x_1, \dots, x_N, y_1, \dots, y_N|z) = \prod_{i=1}^N \sum_{x_i} \rho(x_i, y_i|z) = \prod_{i=1}^N \rho(y_i|z) \end{cases} \quad (S4)$$

are marginals for any specific  $N$ -block sequence of proteins  $A$  and  $B$ . Eq. [S3] ensures the conditional joint entropy to be written extensively in terms of entropic contributions of contact  $i$

$$\begin{aligned}
H(X_1, \dots, X_N, Y_1, \dots, Y_N|z) &= - \sum_{x_1, \dots, x_N, y_1, \dots, y_N} \rho(x_1, \dots, x_N, y_1, \dots, y_N|z) \ln \rho(x_1, \dots, x_N, y_1, \dots, y_N|z) \\
&= - \sum_{x_1, y_1} \rho^*(x_1, y_1|z) \ln \rho^*(x_1, y_1|z) \times \overbrace{\left[ \sum_{x_2, \dots, x_N, y_2, \dots, y_N} \rho^*(x_2, \dots, x_N, y_2, \dots, y_N|z) \right]}^{=1} \dots \\
&\quad - \overbrace{\left[ \sum_{x_1, \dots, x_{N-1}, y_1, \dots, y_{N-1}} \rho^*(x_1, \dots, x_{N-1}, y_1, \dots, y_{N-1}|z) \right]}^{=1} \times \sum_{x_N, y_N} \rho^*(x_N, y_N|z) \ln \rho^*(x_N, y_N|z) \\
&= \sum_i - \sum_{x_i, y_i} \rho^*(x_i, y_i|z) \ln \rho^*(x_i, y_i|z) \\
&= \sum_i H(X_i, Y_i|z)
\end{aligned} \tag{S5}$$

given that

$$\left\{ \begin{aligned} \sum_{x_2, \dots, x_N, y_2, \dots, y_N} \rho^*(x_2, \dots, x_N, y_2, \dots, y_N|z) &= \prod_{i=2}^N \sum_{x_i, y_i} \rho^*(x_i, y_i|z) = 1 \\ &\dots \\ \sum_{x_1, \dots, x_{N-1}, y_1, \dots, y_{N-1}} \rho^*(x_1, \dots, x_{N-1}, y_1, \dots, y_{N-1}|z) &= \prod_{i=1}^{N-1} \sum_{x_i, y_i} \rho^*(x_i, y_i|z) = 1 \end{aligned} \right. \tag{S6}$$

are normalized conditional joint probabilities of  $2(N-1)$ -block sequences. The consequence for the conditional entropy of the individual block variables is then clear

$$\left\{ \begin{aligned} H(X_1, \dots, X_N|z) &= - \sum_{x_1, \dots, x_N} \rho(x_1, \dots, x_N|z) \ln \rho(x_1, \dots, x_N|z) \\ &= - \sum_{x_1} \rho^*(x_1|z) \ln \rho^*(x_1|z) \times \overbrace{\left[ \sum_{x_2, \dots, x_N} \rho^*(x_2, \dots, x_N|z) \right]}^{=1} \dots \\ &\quad - \overbrace{\left[ \sum_{x_1, \dots, x_{N-1}} \rho^*(x_1, \dots, x_{N-1}|z) \right]}^{=1} \times \sum_{x_N} \rho^*(x_N|z) \ln \rho^*(x_N|z) \\ &= \sum_i - \sum_{x_i} \rho^*(x_i|z) \ln \rho^*(x_i|z) \\ &= \sum_i H(X_i|z) \\ H(Y_1, \dots, Y_N|z) &= - \sum_{y_1, \dots, y_N} \rho(y_1, \dots, y_N|z) \ln \rho(y_1, \dots, y_N|z) \\ &= - \sum_{y_1} \rho^*(y_1|z) \ln \rho^*(y_1|z) \times \overbrace{\left[ \sum_{y_2, \dots, y_N} \rho^*(y_2, \dots, y_N|z) \right]}^{=1} \dots \\ &\quad - \overbrace{\left[ \sum_{y_1, \dots, y_{N-1}} \rho^*(y_1, \dots, y_{N-1}|z) \right]}^{=1} \times \sum_{y_N} \rho^*(y_N|z) \ln \rho^*(y_N|z) \\ &= \sum_i - \sum_{y_i} \rho^*(y_i|z) \ln \rho^*(y_i|z) \\ &= \sum_i H(Y_i|z) \end{aligned} \right. \tag{S7}$$

where

$$\left\{ \begin{aligned} \sum_{x_2, \dots, x_N} \rho^*(x_2, \dots, x_N|z) &= \prod_{i=2}^N \sum_{x_i} \rho^*(x_i|z) = 1, \dots, \sum_{x_1, \dots, x_{N-1}} \rho^*(x_1, \dots, x_{N-1}|z) = \prod_{i=1}^{N-1} \sum_{x_i} \rho^*(x_i|z) = 1 \\ \sum_{y_2, \dots, y_N} \rho^*(y_2, \dots, y_N|z) &= \prod_{i=2}^N \sum_{y_i} \rho^*(y_i|z) = 1, \dots, \sum_{y_1, \dots, y_{N-1}} \rho^*(y_1, \dots, y_{N-1}|z) = \prod_{i=1}^{N-1} \sum_{y_i} \rho^*(y_i|z) = 1 \end{aligned} \right. \tag{S8}$$

are normalized probabilities of  $(N-1)$ -block sequences.

Throughout any specific coevolution process  $z$ , the amount of information that protein  $A$  stores about the interacting amino-acids of protein  $B$  is given by the conditional mutual information  $I(X_1, \dots, X_N; Y_1, \dots, Y_N|z)$  between the stochastic variables  $(X_1, \dots, X_N)$  and  $(Y_1, \dots, Y_N)$ .

The expectation value of  $I(X^N; Y^N|z)$  across the entire distribution of  $M!$  distinct coevolution processes reads as

$$I(X_1, \dots, X_N; Y_1, \dots, Y_N|Z) = \sum_z \rho(z') I(X_1, \dots, X_N; Y_1, \dots, Y_N|z') \tag{S9}$$

the mutual information between the block variables conditionally to the discrete stochastic variable  $Z$ . Eq. [S9] can be rewritten

$$I(X_1, \dots, X_N; Y_1, \dots, Y_N|Z) = I(X_1, \dots, X_N; Y_1, \dots, Y_N) + I(X_1, \dots, X_N, Y_1, \dots, Y_N|Z) - I(X_1, \dots, X_N|Z) - I(Y_1, \dots, Y_N|Z) \tag{S10}$$

in terms of the information entropies

$$\begin{cases} I(X_1, \dots, X_N|Z) = H(X_1, \dots, X_N) - H(X_1, \dots, X_N|Z) \\ I(Y_1, \dots, Y_N|Z) = H(Y_1, \dots, Y_N) - H(Y_1, \dots, Y_N|Z) \\ I(X_1, \dots, X_N, Y_1, \dots, Y_N|Z) = H(X_1, \dots, X_N, Y_1, \dots, Y_N) - H(X_1, \dots, X_N, Y_1, \dots, Y_N|Z) \\ I(X_1, \dots, X_N; Y_1, \dots, Y_N) = H(X_1, \dots, X_N) - H(Y_1, \dots, Y_N) - H(X_1, \dots, X_N, Y_1, \dots, Y_N) \end{cases} \quad (S11)$$

associated with single and joint probability distributions  $\{\rho^*(x_1, \dots, x_N|z), \rho^*(y_1, \dots, y_N|z), \rho^*(x_1, \dots, x_N, y_1, \dots, y_N|z)\}$  in eq. [S3 and S4]. For the condition in eq. [S1]

$$\begin{cases} \rho^*(x_1, \dots, x_N|z) = \rho^*(x_1, \dots, x_N) \\ \rho^*(y_1, \dots, y_N|z) = \rho^*(y_1, \dots, y_N) \end{cases}, \quad (S12)$$

the information entropy of either block variables  $H(X_1, \dots, X_N|Z)$  and  $H(Y_1, \dots, Y_N|Z)$  are independent of  $Z$

$$\begin{cases} H(X_1, \dots, X_N|Z) = H(X_1, \dots, X_N) \\ H(Y_1, \dots, Y_N|Z) = H(Y_1, \dots, Y_N) \end{cases} \quad (S13)$$

thus simplifying eq. [S10]

$$I(X_1, \dots, X_N; Y_1, \dots, Y_N|Z) = H(X_1, \dots, X_N) + H(Y_1, \dots, Y_N) - H(X_1, \dots, X_N, Y_1, \dots, Y_N|Z) \quad (S14)$$

into the joint entropy differences between  $(X_1, \dots, X_N)$  and  $(Y_1, \dots, Y_N)$  when unconditionally and conditionally dependent on  $Z$ . From eq. [S5, S7 and S13], the conditional mutual information then rewrites

$$\begin{aligned} I(X_1, \dots, X_N; Y_1, \dots, Y_N|Z) &= \sum_{i=1}^N H(X_i|Z) + H(Y_i|Z) - H(X_i, Y_i|Z) \\ &= \sum_{z'} \rho(z') \sum_{i=1}^N H(X_i|z') + H(Y_i|z') - H(X_i, Y_i|z') \\ &= \sum_{z'} \rho(z') \sum_{i=1}^N I(X_i; Y_i|z') \end{aligned} \quad (S15)$$

implying

$$I(X_1, \dots, X_N; Y_1, \dots, Y_N|z) = \sum_{i=1}^N I(X_i; Y_i|z) \quad (S16)$$

as a direct consequence of eq. [S9].

## REFERENCES

- (1) Cover, T. M.; Thomas, J. A. *Elements of Information Theory 2nd Edition*, 2 edition.; Wiley-Interscience: Hoboken, N.J., 2006.
- (2) Ovchinnikov, S.; Kamisetty, H.; Baker, D. Robust and Accurate Prediction of Residue–Residue Interactions across Protein Interfaces Using Evolutionary Information. *eLife* **2014**, *3*, e02030. <https://doi.org/10.7554/eLife.02030>.

SUPPLEMENTARY FIGURES AND TABLES

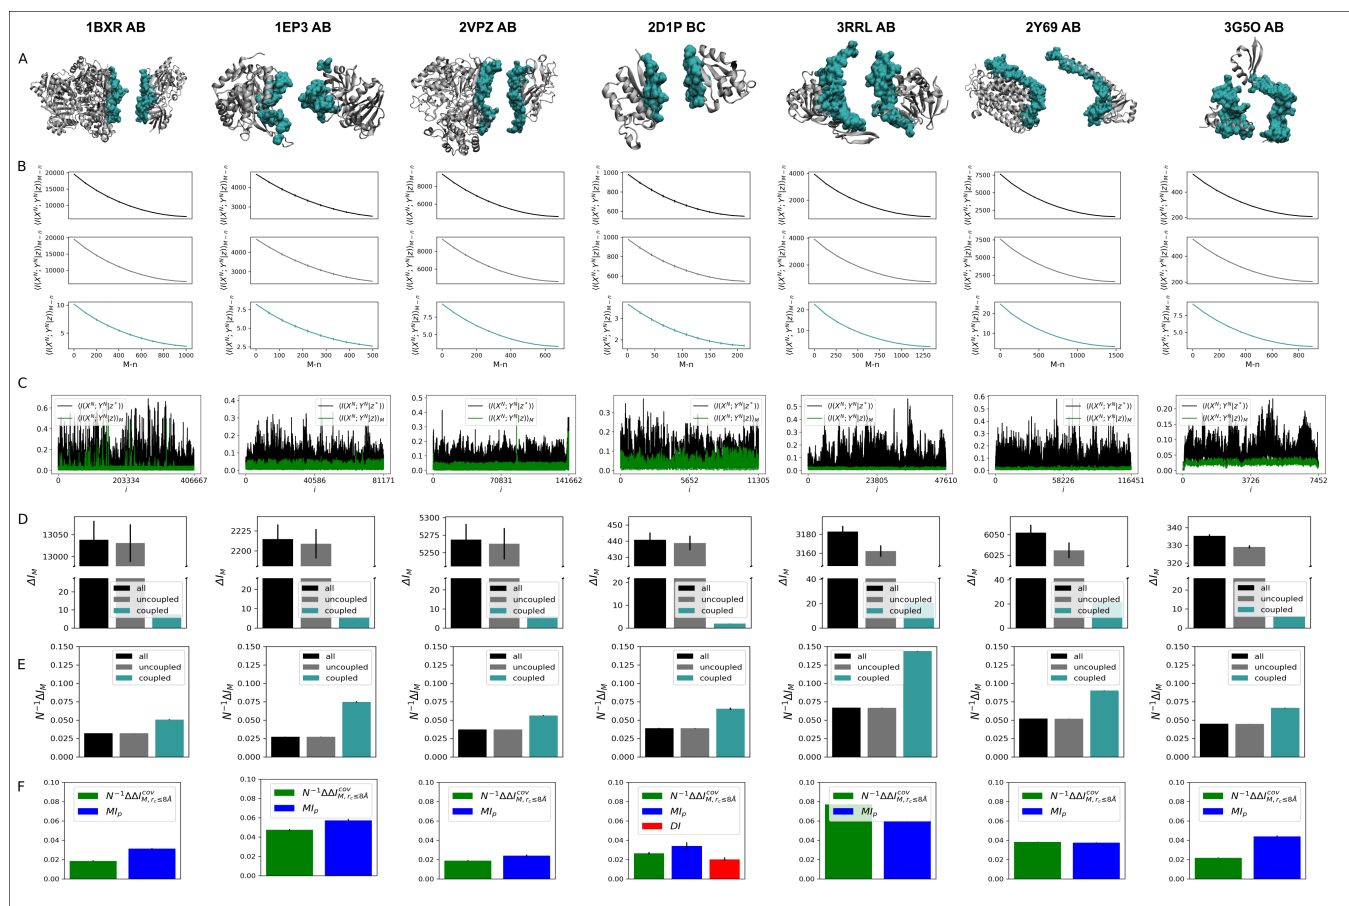

Fig. S1. Informational analysis of protein-protein complexes used in Baker and coworkers.<sup>2</sup> All protein complexes but 2G50 are obligate dimers. (A) Three-dimensional representation of stochastic variables  $X^N$  and  $Y^N$  as defined from physically coupled amino acids at short-range cutoff distances  $r_c \leq 8.0 \text{ \AA}$  (turquoise) and physically uncoupled amino-acids at long-range cutoff distances  $r_c > 8.0 \text{ \AA}$  (gray). (B) Conditional mutual information  $\langle I(X^N; Y^N | z) \rangle_{M-n}$  as a function of the number  $M-n$  of randomly paired proteins in the reference MSA.  $\langle I(X^N; Y^N | z) \rangle_{M-n}$  are expectation values estimated from a generated ensemble of  $\sim 100$  MSA models. (C) Conditional mutual information as a function of protein contact  $i$ . Mutual information  $I(X_i; Y_i | z^*)$  for the reference alignment (black) is systematically larger than  $\langle I(X_i; Y_i | z) \rangle_M$  for scrambled models (green) along every contact  $i$ . (D) Mutual information gap  $\Delta I_M$  between reference and 100 random models featuring  $M$  randomly paired sequences. (E) Per-contact mutual information gap  $N^{-1} \Delta I_M$ . (F) Mutual information decomposition ( $N^{-1} \Delta I_{M, r_c \leq 8 \text{ \AA}}^{Cov}$ ) and comparison with functional mutual information ( $MI_{p, r_c \leq 8 \text{ \AA}}$ ) and direct information ( $DI_{r_c \leq 8 \text{ \AA}}$ ). In C, D, E and F error bars correspond to standard deviations.

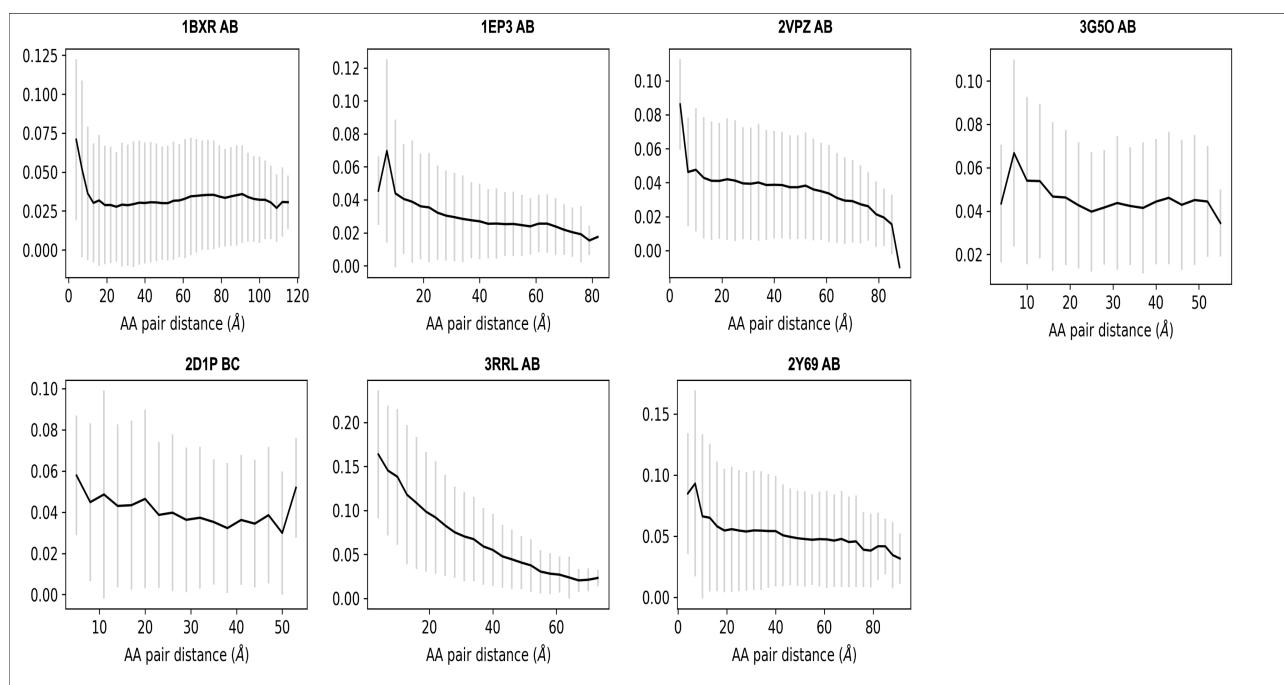

Fig. S2. Information gap  $\Delta I_M$  profile as a function of amino-acid (AA) pair distances. Shown are average values and the associated standard deviations (error bars) of  $\Delta I_M$  at various pair distances. The profile shows few larger values of  $\Delta I_M$  at short distances in contrast to many smaller ones at long distances.

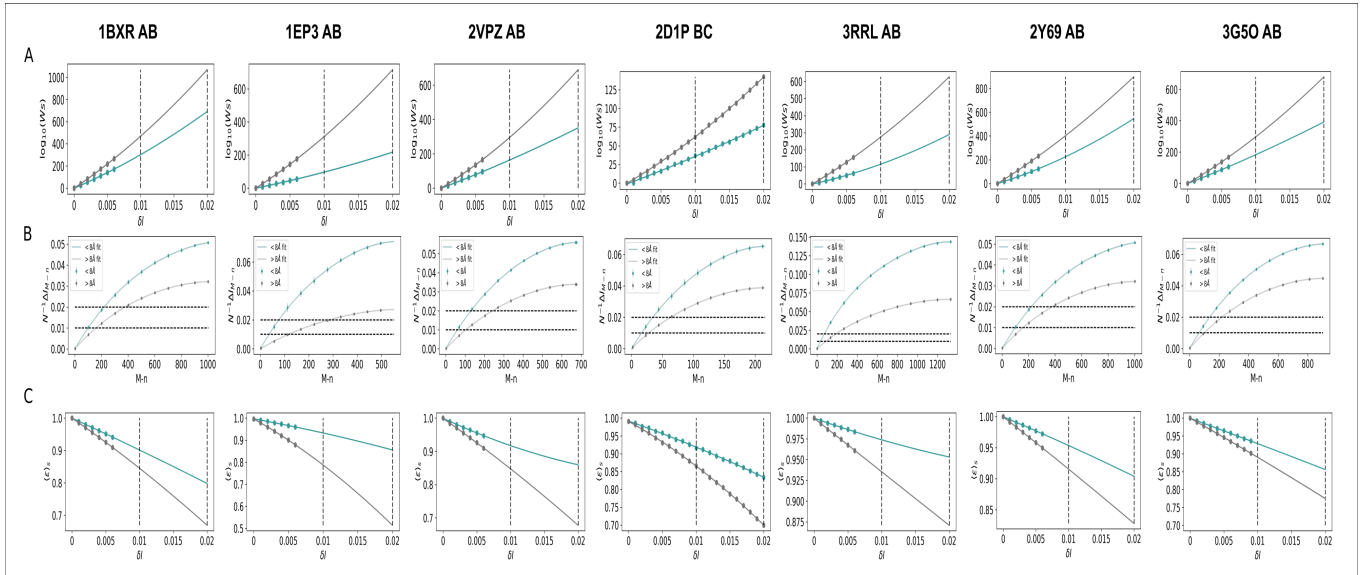

**Fig. S3.** Degeneracy and error analysis for  $X^N$  and  $Y^N$  involving interacting amino acids at short-range distances  $r_c \leq 8.0 \text{ \AA}$  (blue), long-range distances  $r_c > 8.0 \text{ \AA}$  (red), or both (green). (A) Total number  $\omega_s$  of native-like models at various resolutions  $\delta I$ . (B) Per-contact gaps of mutual information  $N^{-1} \Delta I_{M-n, r_c}$  as a function of the number  $M-n$  of randomly paired sequences in the reference alignment. Error bars correspond to standard deviations. (C) Expectation values  $\langle \epsilon \rangle_s$  for the fraction of sequence matches at various resolutions  $\delta I$ .

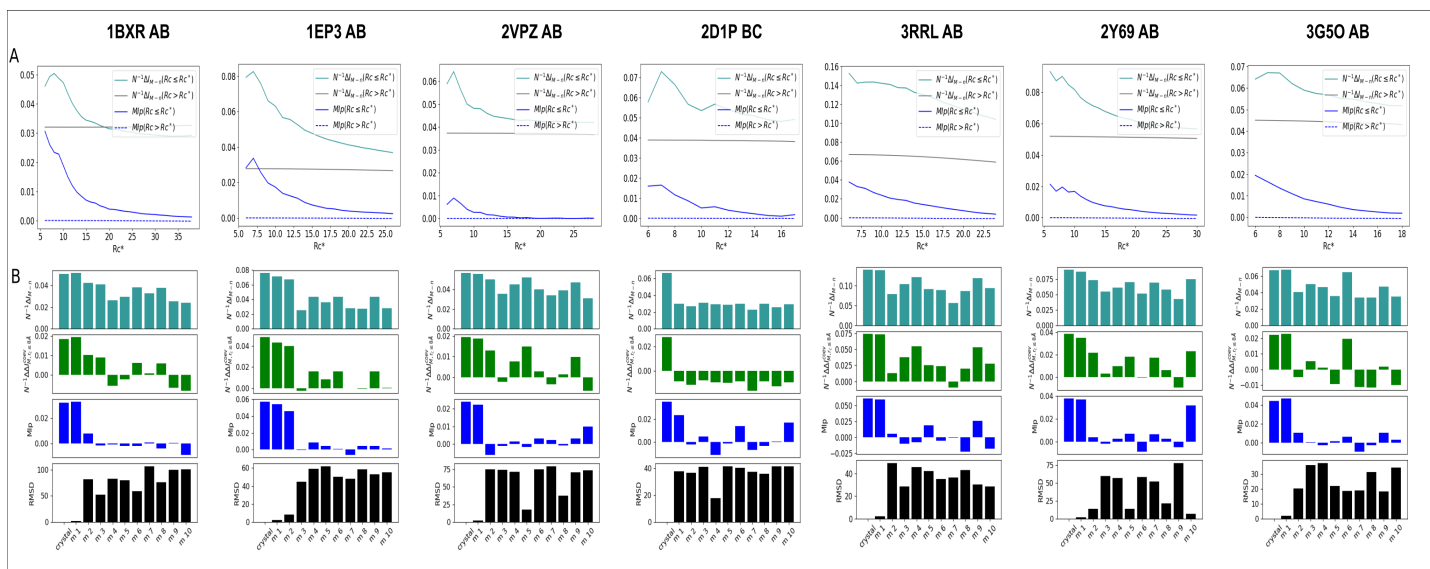

**Fig. S4.** Dependence with contact definition  $r_c^*$  and docking decoys. (A)  $N^{-1}\Delta I_{M,r_c}$  and  $MI_{p,r_c}$  at various  $r_c^*$ . (B)  $N^{-1}\Delta I_{M,r_c}$  (turquoise),  $N^{-1}\Delta\Delta I_{M,r_c}^{Cov}$  (green),  $MI_{p,r_c}$  (blue) at alternative interfaces generated by docking – only physically coupled amino acids as defined for  $r_c \leq 8.0 \text{ \AA}$  were included in the calculations. Black bars represent the root-mean-square deviation (RMSD) between the native bound structure and docking decoys.

**Table-S1.** Rencontres numbers  $\omega_{M,n}$  as a function of the number  $M-n$  of randomly paired sequences in the reference alignment  $\{(x_k^N, y_l^N | z^*)\}_M$ .

| <b>M-n</b> | <b>1BXR AB</b>      | <b>1EP3 AB</b>      | <b>2VPZ AB</b>      | <b>2D1P BC</b>      | <b>3RRL AB</b>      | <b>2Y69 AB</b>      |
|------------|---------------------|---------------------|---------------------|---------------------|---------------------|---------------------|
| 0          | 1                   | 1                   | 1                   | 1                   | 1                   | 1                   |
| 1          | 0                   | 0                   | 0                   | 0                   | 0                   | 0                   |
| 2          | 503506              | 152076              | 228150              | 23220               | 883785              | 1100386             |
| 3          | 336342008           | 55761200            | 102515400           | 3312720             | 782444320           | 1087181368          |
| 4          | 378763143759        | 34439511150         | 77616972225         | 793810530           | 1168091564220       | 1811380056759       |
| 5          | 370346185008800     | 18453455396640      | 50999525216640      | 164548102752        | 1514469649396704    | 2621268206581024    |
| ...        | ...                 | ...                 | ...                 | ...                 | ...                 | ...                 |
| 40         | 1,963993579054E+119 | 4,115347994062E+108 | 1,788169031032E+112 | 1,8626849992297E+91 | 1,830259053207E+124 | 1,558622316946E+126 |
